# Supplementary material
Source: PubMed Central journal article supplement (PMC2886745)
Supplement: jcs.063735_1.pdf [file jcs.063735_1.pdf]

**Table S1.** Strains used and attachment at cytokinesis. Genotype, genetic background and source of the strains used in this work. Note that whilst SCAR and myosin II null strains were generated in Ax3 genetic background, other mutants were generated by others in the Ax2 background. The appropriate control was used in all cases. In order to score detachment at mitosis, time-lapse DIC movies of cells dividing on glass coverslips were captured. Mitoses were scored as detached if at least one of the daughter cells lost contact with the substratum during division. At least 15 divisions were scored for each strain and values are for cells grown in the absence of blebbistatin or doxycycline unless stated.

| Strain    | Genotype                                                       | Reference                  | % Detached  |            |
|-----------|----------------------------------------------------------------|----------------------------|-------------|------------|
| Ax3       | Wt<br>( <i>axeA1,axeB1,axeC1</i> )                             | Sussman and Sussman 1967   | 0           |            |
| IR46      | <i>Ax3, pyr5-6, scrA::pyr5-6</i>                               | Blagg <i>et al.</i> 2003   | -Bleb<br>65 | +Bleb<br>0 |
| JK103     | <i>Ax3,mhcA::bsr</i>                                           | This work                  | 0           |            |
| JK107     | <i>Ax3, scrA::pyr5-6, mhcA::bsr, P<sub>Tet-ON</sub> - scrA</i> | This work                  | +Dox<br>0   | -Dox<br>0  |
| AP1       | <i>Ax3, hspc300::bsr</i>                                       | Pollitt and Insall, 2009   |             |            |
| IR57      | <i>Ax3, napA::bsr</i>                                          | Ibarra <i>et al.</i> 2006  |             |            |
| SB3       | <i>Ax3, pir121::bsr</i>                                        | Blagg <i>et al.</i> 2003   |             |            |
| Ax2       | Wt<br>( <i>axeA2,axeB2,axeC2</i> )                             | Watts and Ashworth 1970    | 3           |            |
| EB1       | <i>Ax2, ebl::bsr</i>                                           | Rehberg and Graf 2002      | 73          |            |
| Ax2 scar- | <i>Ax2, scrA::bsr</i>                                          | Steffen <i>et al.</i> 2006 |             |            |
